# Supplementary material
Source: Springer Nature journal article supplement (https://www.springermedizin.de/resource/supplementary/13058_2012_3166_MOESM4_ESM.pdf/9703414)

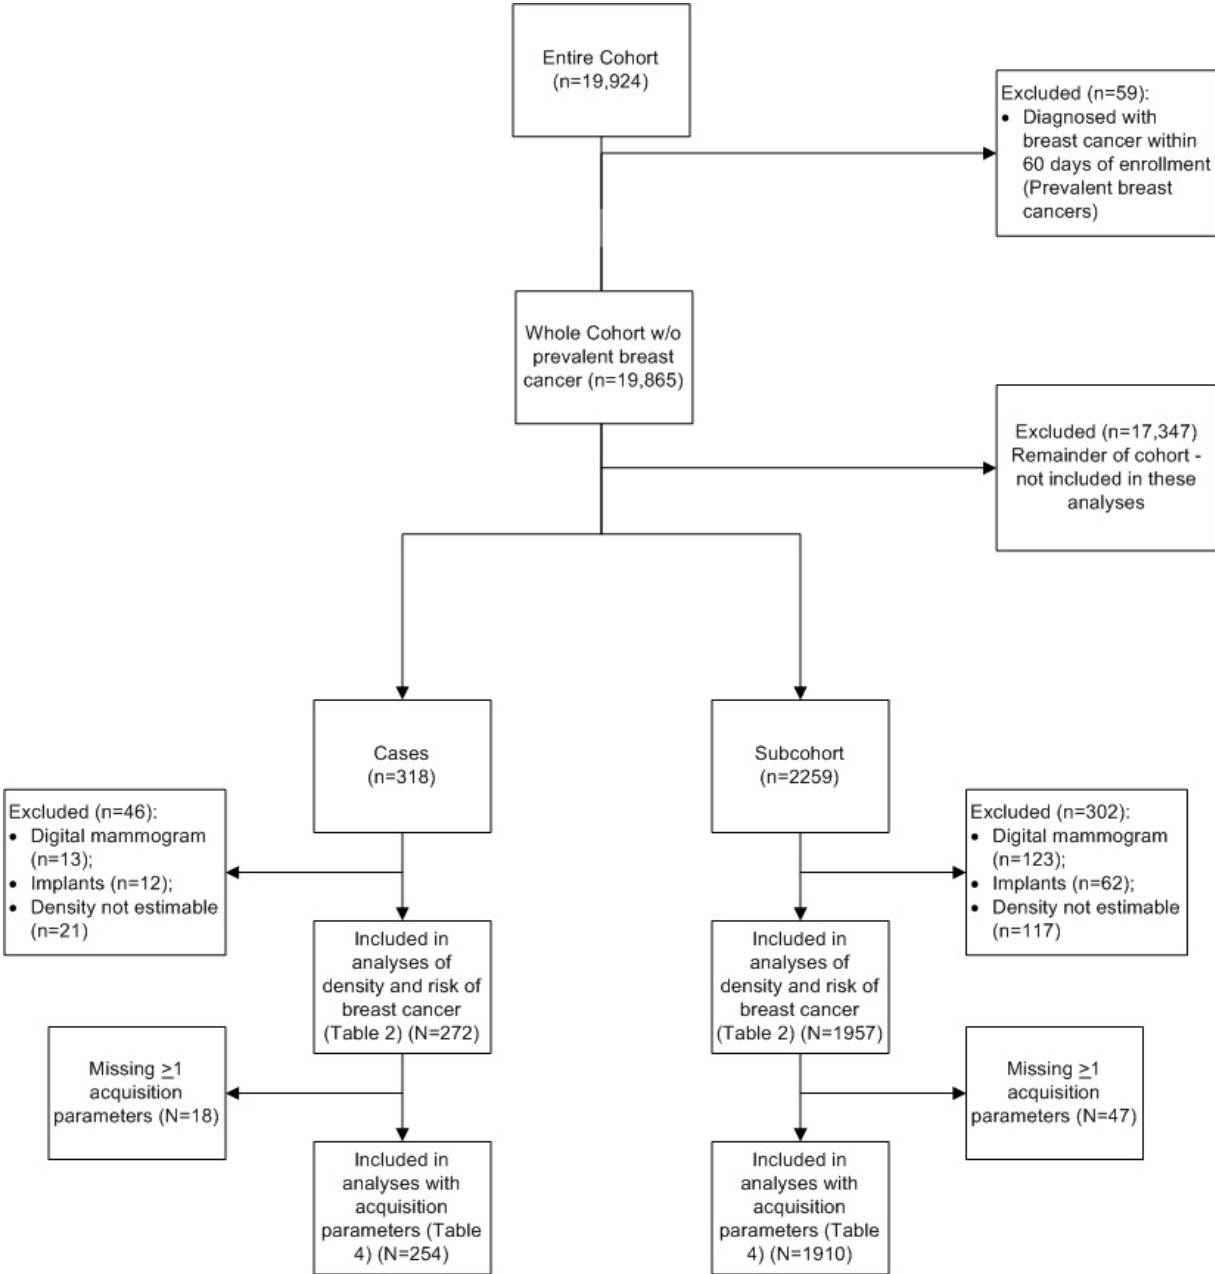

Supplement: MOESM4 [file 9703414]
